# Errata

American Diabetes Association: Standards of medical care in diabetes (Position Statement). *Diabetes Care* 28 (Suppl. 1): S4–S36, 2005

Below is a list of changes to the above-listed article. The online version reflects these changes.

- In the first column of p. S15, “ $\beta$ -blocker arm” should read “ $\alpha$ -blocker arm” in the last sentence of the second complete paragraph. The sentence will therefore read “The  $\alpha$ -blocker arm of the ALLHAT was terminated after interim analysis showed that doxazosin was substantially less effective in reducing CHF than diuretic therapy (78).”
- Also on p. S15 in the ninth line of the second column, “labetalol” (rather than “labetolol”) is the correct spelling.
- On p. S19 in the first complete sentence of the first column, the correct URL for the GFR calculator is “[http://www.kidney.org/kls/professionals/gfr\\_calculator.cfm](http://www.kidney.org/kls/professionals/gfr_calculator.cfm).”

Clausen TD, Mathiesen E, Ekbom P, Hellmuth E, Mandrup-Poulsen T, Damm P: Poor pregnancy outcome in women with type 2 diabetes. *Diabetes Care* 28:323–328, 2005

In the above-listed article, incorrect dates are listed at the end of the abstract and the third paragraph of the introduction. In both places, “1980–1992” should appear in place of “1982–1990.”
